# Supplementary material
Source: PubMed Central journal article supplement (PMC4783255)
Supplement: NIHMS753105-supplement-supplemental_material.pdf [file NIHMS753105-supplement-supplemental_material.pdf]

# SUPPLEMENTAL MATERIAL

## **Alcohol and immediate risk of cardiovascular events:**

### **A systematic review and dose-response meta-analysis**

#### *Data Synthesis and Analysis*

##### Meta-Analysis of Any Alcohol Intake

For each outcome and hazard period, we included one estimate per study. For studies that did not report an overall estimate, we first pooled the RRs across sex and/or levels of alcohol consumption by using a random-effects model. We used DerSimonian and Laird<sup>1</sup> random-effects models to pool the RRs across studies for each outcome and each hazard period, and we generated a forest plot for each analysis, with the studies sorted by publication year.

Because the DerSimonian and Laird methods can underestimate statistical heterogeneity when heterogeneity is high or few studies are pooled, we conducted sensitivity analyses using the Profile Likelihood estimation method.<sup>2</sup> Results were almost identical between the two methods, so DerSimonian and Laird results are presented in the text and figures. We conducted sensitivity analyses to evaluate potential information bias by excluding one study at a time to assess the influence of individual studies on the pooled estimate. Using the Egger<sup>3</sup> test and visual inspection of funnel plots,<sup>3</sup> we explored the possibility of publication bias due to missing or different estimates from small studies with less precise estimates compared to larger studies with greater precision. In a sensitivity analysis, we included estimates from case-control studies that did not account for confounders, and we conducted an analysis restricted to studies with only IS rather than a combined endpoint of both IS and HS.

### Dose-Response Meta-Analysis

To examine the impact of the amount of alcohol consumed prior to event onset, we generated a forest plot for each analysis, with studies sorted by amount of alcohol. We conducted a dose-response meta-analysis for each outcome and the risk in the day and week following intake. For each study, we assigned the median or mean grams of alcohol intake for each exposure level to the corresponding RR. When the median or mean intake per category was not reported, we assigned the midpoint of the upper and lower boundaries in each category. When the median intake for the lowest category was not provided, we assumed a value of zero. If the upper boundary was not reported, we assigned a value of 1.2 times the lower boundary for that category, as in previous work.<sup>4</sup> When a study used different amounts of intake for men and women to calculate a single RR, we calculated a weighted average of the median dose according to the sample sex distribution. When a study reported alcohol consumption in number of drinks, we converted it to grams assuming that one drink contains 12 grams of alcohol if standard drink size was not defined.

To examine potential nonlinear relationships between alcohol intake and cardiovascular risk, we performed 2-stage random-effects dose-response meta-analyses.<sup>5</sup> [ENREF 8](#) First, we constructed study-specific restricted cubic spline models with 3 knots at fixed percentiles (10%; 50%; 90%) of the exposure distribution<sup>6</sup> using generalized least square regression that accounts for the correlation between estimates within each study.<sup>7</sup> Second, we combined study-specific estimates and the variance/covariance matrix using a random-effects model.<sup>1</sup> We conducted a test for the overall significance of the curve by testing the joint impact of the spline transformations. We examined whether a nonlinear relationship exists by testing the null hypothesis that the regression coefficients of the spline transformations are all equal to zero. We did not have sufficient statistical power to formally assess whether the associations were

different for men and women, so we qualitatively assessed whether there were apparent differences when sex-specific estimates were available.

For the analyses of any intake and the dose-response analyses, we evaluated heterogeneity across studies with the Cochrane Q  $\chi^2$  test<sup>8</sup> and we calculated the  $I^2$  statistic to quantify the proportion of between-study heterogeneity attributable to variability in the association rather than sampling variation; values of 25%, 50% and 75% were considered to represent low, medium and high heterogeneity respectively.<sup>9</sup>

### **Supplementary Figure 1 Legend**

Forest plot of relative risks (RRs) and 95% confidence intervals (CIs) for the association between alcohol consumption and cardiovascular events in the following day and week by amount of alcohol intake. Squares indicate study-specific RR estimates, with the size of the square reflecting the proportion of the DerSimonian and Laird weights; horizontal lines indicate the 95% CI. The dotted line indicates the value for no association. The RRs and 95% confidence intervals for each amount are presented in the column on the right. These values were used to conduct the dose-response meta-analyses and resulting splines in the Figure 4 that accounts for the covariance among the estimates from a single study.

### **Supplementary Figure 1**

**MI or Coronary Event**

**12 Hours**

Gerlich, 2009 women: ≤24g, men: ≤ 36g 2.30 (0.99, 5.33)  
 Gerlich, 2009 women: ≥48g, men: ≤ 60g 3.00 (0.31, 29.39)

**24 Hours**

Jackson, 1992 1-2 drinks, men, coronary death 0.61 (0.44, 0.84)  
 Jackson, 1992 1-2 drinks, men, nonfatal MI 0.73 (0.59, 0.91)  
 Jackson, 1992 1-2 drinks, women, coronary death 0.60 (0.22, 1.63)  
 Jackson, 1992 1-2 drinks, women, nonfatal MI 0.59 (0.37, 0.94)  
 McElduff, 1997 1-2 drinks, men 0.74 (0.51, 1.08)  
 McElduff, 1997 1-2 drinks, women 0.43 (0.20, 0.94)  
 Jackson, 1992 3-4 drinks, men, coronary death 0.57 (0.41, 0.79)  
 Jackson, 1992 3-4 drinks, men, nonfatal MI 0.67 (0.51, 0.88)  
 Jackson, 1992 3-4 drinks, women, coronary death 0.52 (0.16, 1.70)  
 Jackson, 1992 3-4 drinks, women, nonfatal MI 0.81 (0.48, 1.37)  
 McElduff, 1997 3-4 drinks, men 1.06 (0.65, 1.72)  
 McElduff, 1997 3-4 drinks, women 0.44 (0.13, 1.50)  
 Jackson, 1992 >4 drinks, men, coronary death 0.60 (0.43, 0.83)  
 Jackson, 1992 >4 drinks, men, nonfatal MI 0.76 (0.61, 0.95)  
 Jackson, 1992 >4 drinks, women, coronary death 0.73 (0.20, 2.72)  
 Jackson, 1992 >4 drinks, women, nonfatal MI 0.50 (0.22, 1.13)  
 McElduff, 1997 ≥5 drinks, women 1.15 (0.24, 5.62)  
 McElduff, 1997 5-8 drinks, men 0.72 (0.41, 1.26)  
 McElduff, 1997 ≥9 drinks, men 1.46 (0.57, 3.72)

**1 Week**

Schröder, 2007 ≤140g, men 0.22 (0.11, 0.44)  
 Schröder, 2007 >20, ≤30 g/d, men 0.14 (0.06, 0.34)  
 Schröder, 2007 >30 g/d, men 0.50 (0.22, 1.12)

**Ischemic Stroke**

**24 Hours**

Haapaniemi, 1997 1-40g, men 1.09 (0.60, 1.97)  
 Haapaniemi, 1997 1-40g, women 0.68 (0.35, 1.32)  
 Haapaniemi, 1997 >40g, women 5.68 (1.75, 18.46)  
 You, 1997 ≥ 60g 0.90 (0.27, 3.03)  
 Haapaniemi, 1997 41-120g, men 3.74 (1.81, 7.71)  
 Haapaniemi, 1997 >120g, men 7.57 (1.97, 29.09)

**48 Hours**

Syrjänen, 1988 >80g over a few hours 6.00 (0.92, 39.10)

**1 Week**

Malarcher, 2001 <12g/d, women 0.63 (0.37, 1.07)  
 Shinton, 1993 1-14/ drinks 0.48 (0.19, 1.24)  
 Jamrozik, 1994 7-140g 0.76 (0.52, 1.12)  
 Numminen, 1996 1-150g 0.98 (0.62, 1.55)  
 Malarcher, 2001 12-24g/d, women 0.89 (0.33, 2.39)  
 Shinton, 1993 15-29 drinks 0.66 (0.22, 1.99)  
 Malarcher, 2001 >24 g, women 2.00 (0.51, 7.85)  
 Jamrozik, 1994 147-280g 0.63 (0.26, 1.53)  
 Numminen, 1996 151-300g 1.76 (0.79, 3.95)  
 Shinton, 1993 >29 drinks 0.93 (0.33, 2.59)  
 Jamrozik, 1994 287-420g 0.49 (0.15, 1.62)  
 Numminen, 1996 >300 g 4.92 (1.64, 14.74)  
 Jamrozik, 1994 ≥ 427g 2.15 (0.69, 6.67)

**Hemorrhagic Stroke**

**24 Hours**

Thrift, 1999 men:1-40g, women:1-20g 0.60 (0.30, 1.20)  
 Vlak, 2011 ≥1 glass 0.20 (0.14, 0.28)  
 Juvela, 1993 1-40g, men 0.34 (0.14, 0.82)  
 Juvela, 1993 1-40g, women 0.35 (0.16, 0.78)  
 Juvela, 1995 1-40g 0.33 (0.16, 0.70)  
 Thrift, 1999 men:>40-60g, women:>20-40g 1.10 (0.49, 2.46)  
 Juvela, 1993 >40g, women 6.36 (2.26, 17.91)  
 Thrift, 1999 men:>60g, women: >40g 1.60 (0.58, 4.38)  
 Juvela, 1993 41-120g, men 2.45 (1.10, 5.46)  
 Juvela, 1995 41-120g 4.56 (2.20, 9.44)  
 Juvela, 1993 >120g, men 4.45 (1.54, 12.86)  
 Juvela, 1995 >120g 11.34 (3.00, 42.83)

**1 Week**

Jamrozik, 1994 7-140g 0.26 (0.11, 0.62)  
 Juvela, 1993 1-150g, men 1.01 (0.58, 1.75)  
 Juvela, 1993 1-150g, women 0.83 (0.50, 1.38)  
 Juvela, 1995 1-150g 2.00 (1.14, 3.50)  
 Jamrozik, 1994 147-280g 0.15 (0.02, 1.19)  
 Juvela, 1993 150-300g, men 3.43 (1.60, 7.36)  
 Juvela, 1993 150-300g, women 3.15 (1.07, 9.29)  
 Juvela, 1995 150-300g 4.29 (1.56, 11.77)  
 Jamrozik, 1994 287-420g 0.35 (0.05, 2.47)  
 Juvela, 1993 >300g, men 6.00 (2.65, 13.58)  
 Juvela, 1993 >300g, women 12.12 (1.51, 97.23)  
 Juvela, 1995 >300g 6.52 (2.41, 17.65)  
 Saloheimo, 2001 >300g 3.40 (0.84, 13.73)  
 Jamrozik, 1994 ≥427g 4.42 (0.89, 21.93)

Relative Risk (Log Scale) .5 1 2 4 8 16

**Supplementary Table 1.** Characteristics of Studies of Alcohol Consumption and Cardiovascular Events Included in the Meta-Analysis, 1987-2015

| Author, Year    | Country       | Sample Size              | Age                         | Sex                | Design         | Outcome                                 | Hazard Periods (Hours) | Adjustments                                                                                                                                           |
|-----------------|---------------|--------------------------|-----------------------------|--------------------|----------------|-----------------------------------------|------------------------|-------------------------------------------------------------------------------------------------------------------------------------------------------|
| Jackson, 1992   | New Zealand   | 526 cases, 1183 controls | 35 - 64 years               | 70% men, 30% women | Case-control   | Nonfatal MI and Coronary Death          | 24                     | Matched for age and sex<br>Adjusted for age, smoking, usual alcohol consumption                                                                       |
| McElduff, 1997  | Australia     | 600 cases, 801 controls  | 35 - 69 years               | 68% men, 32% women | Case-control   | Nonfatal and Fatal Major Coronary Event | 24                     | Adjusted for age, smoking, high blood pressure, high cholesterol concentration, previous MI, stroke, angina, usual alcohol consumption                |
| Marshall, 2000  | New Zealand   | 547 cases, 1582 controls | 35 - 74 years               | 85% men, 15% women | Case-crossover | Nonfatal MI and Coronary Death          | 24                     | Self-matched                                                                                                                                          |
| Schröder, 2007  | Spain         | 244 cases, 1270 controls | 25 - 74 years<br>Mean: 51.6 | 100% men           | Case-control   | Nonfatal MI and Coronary Death          | 168                    | Matched for region<br>Adjusted for age, smoking, education, leisure-time activity, total, LDL and HDL-cholesterol, DM, hypercholesterolemia drug, HTN |
| Gerlich, 2009   | Switzerland   | 250 cases                | 30 - 88 years<br>Mean: 59.7 | 79% men, 21% women | Case-crossover | Incident Nonfatal MI                    | 12                     | Self-matched                                                                                                                                          |
| Gerlich, 2010   | Switzerland   | 397 cases                | 29 - 88 years<br>Mean: 59.7 | 79% men, 21% women | Case-crossover | Incident Nonfatal MI                    | 12                     | Self-matched                                                                                                                                          |
| Leon, 2010      | Russia        | 28 cases, 28 controls    | 25 - 54 years               | 100% men           | Case-control   | Death from MI, IHD, Hemorrhagic Stroke  | 168                    | Matched by age<br>Adjusted for education and smoking                                                                                                  |
| Leong, 2014     | 52 Countries  | 11,652 cases             | Mean: 57.5                  | 75% men, 25% women | Case-crossover | Incident Nonfatal MI                    | 24                     | Self-matched                                                                                                                                          |
| Mostofsky, 2015 | United States | 3,869 cases              | Mean: 61.4                  | 68% men, 32% women | Case-crossover | Nonfatal MI                             | 1,24                   | Self-matched                                                                                                                                          |
| Taylor, 1985    | United States | 17 cases, 17 controls    | Mean: 39.5                  | 59% men, 41% women | Case-control   | Ischemic Stroke and Hemorrhagic Stroke  | 24                     | Matched by age, sex, race, day of week admitted to the hospital<br>Crude estimate                                                                     |

| Author, Year     | Country       | Sample Size             | Age                           | Sex                | Design       | Outcome                                                                     | Hazard Periods (Hours) | Adjustments                                                                                                                                |
|------------------|---------------|-------------------------|-------------------------------|--------------------|--------------|-----------------------------------------------------------------------------|------------------------|--------------------------------------------------------------------------------------------------------------------------------------------|
| Gorelick, 1987   | United States | 205 cases, 410 controls | 43-89 years<br>Mean: 65.0     | 66% men, 34% women | Case-control | Incident Nonfatal Ischemic Stroke                                           | 24,72                  | Matched by age, sex, race, method of hospital payment<br>Adjusted for cigarette smoking, HTN                                               |
| Syrjänen, 1988   | Finland       | 54 cases, 54 controls   | 17-49 years<br>Mean: 37.8     | 61% men, 39% women | Case-control | Nonfatal Ischemic Stroke                                                    | 48                     | Matched for age and sex                                                                                                                    |
| Shinton, 1993    | England       | 125 cases, 198 controls | 35 - 74 years<br>Median: 64.1 | Not reported       | Case-control | Nonfatal Ischemic Stroke, Intracerebral Hemorrhage, Subarachnoid Hemorrhage | 168                    | Matched for age and sex                                                                                                                    |
| Jamrozik, 1994   | Australia     | 59 cases, 279 controls  | Not reported                  | Not reported       | Case-control | Nonfatal Ischemic Stroke, Primary Intracerebral Hemorrhage                  | 168                    | Matched for age and sex<br>Adjusted for tobacco, HTN, DM, stroke or TIA, MI, adding salt to food, consume fish>2X/ month                   |
| Numminen, 1996   | Finland       | 426 cases, 157 controls | Mean: 46.3                    | 68% men, 32% women | Case-control | Incident Nonfatal Ischemic Stroke                                           | 168                    | Adjusted for age, sex, CHD, MI, DM, hyperlipidemia, atrial fibrillation, heavy drinking, HTN, current smoking, platelet count              |
| You, 1997        | Australia     | 201 cases, 201 controls | 15 - 60 years<br>Mean: 45.4   | 60% men, 40% women | Case-control | Incident Nonfatal Ischemic Stroke                                           | 24                     | Matched by neighborhood, age, sex<br>Adjusted for cigarette smoking, HTN, high cholesterol, CHD, DM, oral contraceptive, physical exercise |
| Haapaniemi, 1997 | Finland       | 506 cases, 345 controls | 16 - 60 years<br>Mean: 47.9   | 71% men, 29% women | Case-control | Incident Nonfatal Ischemic Stroke                                           | 24,168                 | Adjusted for sex, age, smoking status, current smoking, cardiac disease, HTN, DM, hyperlipemia, history of TIA, migraine, heavy drinking   |
| Bråthen, 2000    | Norway        | 91 cases, 254 controls  | Mean: 48.2                    | 50% men, 50% women | Case-control | Nonfatal Ischemic Stroke                                                    | 72                     | Not reported                                                                                                                               |

| Author, Year    | Country       | Sample Size             | Age                         | Sex                | Design         | Outcome                                    | Hazard Periods (Hours) | Adjustments                                                                                                                                                                        |
|-----------------|---------------|-------------------------|-----------------------------|--------------------|----------------|--------------------------------------------|------------------------|------------------------------------------------------------------------------------------------------------------------------------------------------------------------------------|
| Malarcher, 2001 | United States | 224 cases, 392 controls | 15 - 44 years               | 100% women         | Case-control   | Incident Nonfatal Ischemic Stroke          | 24,168                 | Matched by age and region of residence<br>Adjusted for age, race, education, smoking, BMI, total and HDL cholesterol, history of HTN, CHD, DM, average alcohol intake in past year |
| Mostofsky, 2010 | United States | 390 cases               | Mean: 68.4                  | 54% men, 46% women | Case-crossover | Nonfatal Ischemic Stroke                   | 1,24                   | Self-matched                                                                                                                                                                       |
| Vlak, 2011      | Netherlands   | 250 cases               | Mean: 54.7                  | 25% men, 75% women | Case-crossover | Nonfatal Intracranial Aneurysm             | 24                     | Self-matched                                                                                                                                                                       |
| Juvela, 1993    | Finland       | 278 cases, 314 controls | 15 - 60 years<br>Mean: 43.8 | 52% men, 48% women | Case-control   | Nonfatal Subarachnoid Hemorrhage           | 24,168                 | Matched by age, sex, day of onset of symptoms, and acuteness of the disease onset<br>Adjusted for HTN, age, smoking status                                                         |
| Juvela, 1995    | Finland       | 156 cases, 332 controls | 16 - 60 years<br>Mean: 47.3 | 59% men, 41% women | Case-control   | Incident Nonfatal Intracerebral Hemorrhage | 24,168                 | Matched by hospital, sex, age, day of onset of symptoms, and acuteness of onset<br>Adjusted for HTN, alcohol within day or week, sex, age, BMI, and smoking status                 |
| Thrift, 1999    | Australia     | 331 cases, 331 controls | 18 - 80 years<br>Mean: 63.4 | 60% men, 40% women | Case-control   | Incident Nonfatal Intracerebral Hemorrhage | 24                     | Matched by neighborhood, sex, and age<br>Adjusted for cholesterol, previous CVD, DM, exercise, BMI, smoking, education, day of week of stroke (cases) or interview (controls)      |
| Saloheimo, 2001 | Finland       | 98 cases, 206 controls  | 36 - 90 years<br>Mean: 65.7 | 58% men, 41% women | Case-control   | Nonfatal Intracerebral Hemorrhage          | 168                    | Matched for age and sex<br>Adjusted for age, sex, treated and untreated HTN, IS, epistaxis, epilepsy, recent physical exertion                                                     |

DM=diabetes mellitus  
HTN=hypertension  
BMI=body mass index  
TIA=transient ischemic attack  
CHD=coronary heart disease  
CVD=cardiovascular disease



## References

1. DerSimonian R and Laird N. Meta-analysis in clinical trials. *Control Clin Trials*. 1986;7:177-88.
2. Cornell JE, Mulrow CD, Localio R, Stack CB, Meibohm AR, Guallar E and Goodman SN. Random-effects meta-analysis of inconsistent effects: a time for change. *Ann Intern Med*. 2014;160:267-70.
3. Egger M, Davey Smith G, Schneider M and Minder C. Bias in meta-analysis detected by a simple, graphical test. *BMJ*. 1997;315:629-34.
4. Costanzo S, Di Castelnuovo A, Donati MB, Iacoviello L and de Gaetano G. Alcohol consumption and mortality in patients with cardiovascular disease: a meta-analysis. *J Am Coll Cardiol*. 2010;55:1339-47.
5. Orsini N, Bellocco R and Greenland S. Generalized least squares for trend estimation of summarized dose-response data. *Stata Journal*. 2006;6:40-57.
6. Harrell FE. *Regression modeling strategies : with applications to linear models, logistic regression, and survival analysis*. New York: Springer; 2001.
7. Greenland S and Longnecker MP. Methods for trend estimation from summarized dose-response data, with applications to meta-analysis. *Am J Epidemiol*. 1992;135:1301-9.
8. Cochran W. The combination of estimates from different experiments. *Biometrics*. 1954;10:101-129.
9. Higgins JP, Thompson SG, Deeks JJ and Altman DG. Measuring inconsistency in meta-analyses. *BMJ*. 2003;327:557-60.
